# Supplementary material
Source: publisher site journal article supplement (https://www.dovepress.com/article/supplementary_file/535311/535311%20Revised%20Supplementary%20Materials.docx)
Supplement: Supplementary file 1 [file 535311%20Revised%20Supplementary%20Materials.docx]

**Supplementary Table S1** Instruments and reagents for in vivo experiments.

| Name | Company | Catalog Number |
| --- | --- | --- |
| Sprague Dawley (SD) male rats | Beijing Vital River Laboratory Animal Technology Co., Ltd, China | SCxK (Jing) 2021–0006 |
| Papain | Beijing Soleibao Biotechnology Co., LTD, China | G8430 |
| L-cysteine | Beijing Soleibao Biotechnology Co., LTD, China | C0012 |
| Sodium pentobarbital | Sigma-Aldrich Corporation, USA | P3761 |
|  | Stolting lnc, USA | ALMEMO 2450 |
| Dehydrator | Wuhan Junjie Electronics Co., LTD, China | JJ-12J |
| Embedding machine | Wuhan Junjie Electronics Co., LTD, China | JB-P5 |
| Pathological microtome | Shanghai Leica Instrument Co., LTD, China | RM2016 |
| Frozen table | Wuhan Junjie Electronics Co., LTD, China | JB-L5 |
| Oven | Shanghai Huitai Instrument Manufacturing Co., LTD, China | DHG-9140A |
| Microwave oven | Galanz microwave electric appliance Co., LTD, China | P70D20TL-P4 |
| Decolorizing shaker | SCILOGEX, USA | CF1524R |
| Anhydrous ethanol | Sinopharm Group Chemical reagent Co., LTD, China | 100092683 |
| Xylene | Sinopharm Group Chemical reagent Co., LTD, China | 10023418 |
| Neutral gum | Sinopharm Group Chemical reagent Co., LTD, China | 10004160 |
| Positive fluorescence microscope | Nikon, Japan | ECLIPSE |
| Imaging system | Nikon, Japan | DS-U3 |
| Dewaxing solution | Wuhan Servicebio Biotechnology Co., LTD, China | G1128 |
| Slide | Jiangsu Shitai experimental equipment Co., LTD, China | 188105 |
| Coverslip | Jiangsu Shitai experimental equipment Co., LTD, China | 10212432C |
| Electron microscope fixative | Wuhan Xavier Biotechnology Co., LTD, China | G1102 |
| Transmission electron microscope | Hitachi, Japan | HT7800 |
| Transmission electron microscope imaging system | Hitachi, Japan | Hitachi TEM system |
| Ultra microtome | Leica, Germany | Leica UC7 |
| 4℃ centrifuge | Quzhou Xinzhi Biotechnology Co., LTD, China | CF1524R |
| Ultra-clean table | Suzhou purification Equipment Co., LTD, China | SW-CJ-2D |
| Diamond slicing knife | Daitome, Japan | Ultra 45° |
| Osmic acid | Beijing Bole Biological Technology Co., LTD, China | 18456 |
| Microcoder | Thermo Fisher Scientific, USA | Multiskan FC |
| Pipette | Shanghai Baoyu De Scientific Instrument Co., LTD, China | Genex Beta |
| GraphPad Prism 8.0.2 | GraphPad Software | - |

**Supplementary Table S2** The results of Cochran’ s Q test, MR-Egger intercept, MR-PRESSO and Steiger test

| Exposure | Outcome | Cochran’s Q test (Q value /P value) | | MR-Egger intercept (P value) | MR-PRESSO  (P value) | Steiger test  (P value) |
| --- | --- | --- | --- | --- | --- | --- |
| IFN-γ | Knee osteoarthritis | 25.299 | 0.710 | 0.942 | 0.745 | 0.000 |
| IL-1β | Knee osteoarthritis | 9.032 | 0.700 | 0.218 | 0.619 | 6.30e-102 |
| IL-17 | Knee osteoarthritis | 1.792 | 0.773 | 0.524 | 0.777 | 1.96e-27 |
| TGF-β1 | Knee osteoarthritis | 9.800 | 0.279 | 0.102 | 0.310 | 0.000 |
| MMP-3 | Knee osteoarthritis | 51.214 | 0.386 | 0.323 | 0.364 | 0.000 |
| MMP-10 | Knee osteoarthritis | 36.903 | 0.731 | 0.227 | 0.756 | 0.000 |
| OCN | Knee osteoarthritis | 17.664 | 0.856 | 0.836 | 0.184 | 0.000 |
| PTH | Knee osteoarthritis | 23.967 | 0.521 | 0.407 | 0.518 | 9.49e-149 |


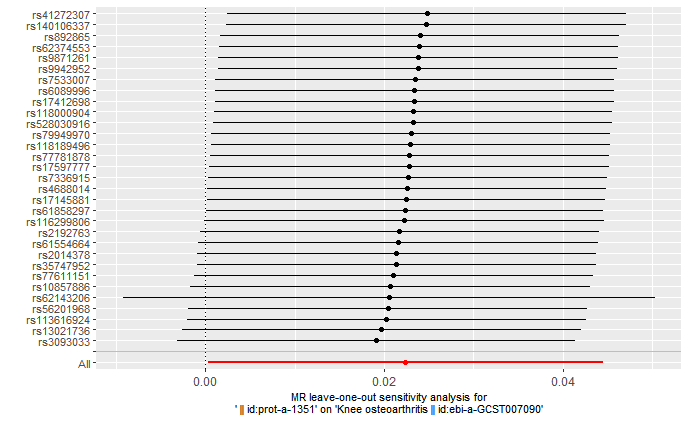


**Supplementary Figure S1** The resulis of LOO analysis for IFN-γ on KOA.


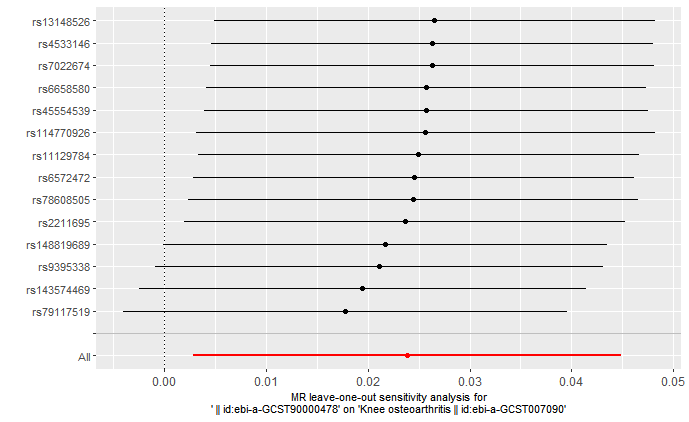


**Supplementary Figure S2** The resulis of LOO analysis for IL-1β on KOA.

**
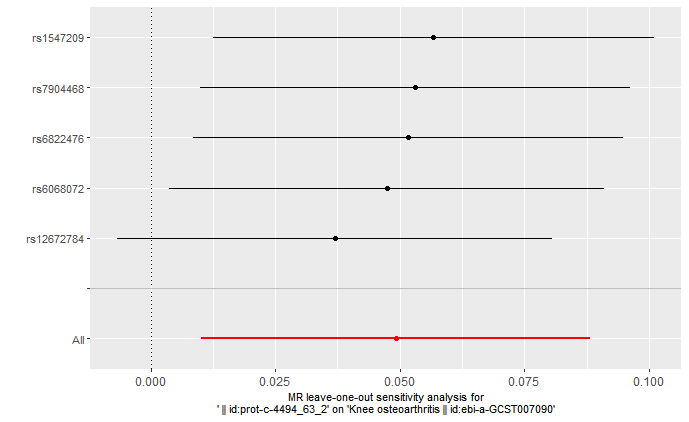
**

**Supplementary Figure S3** The resulis of LOO analysis for IL-17 on KOA.

**
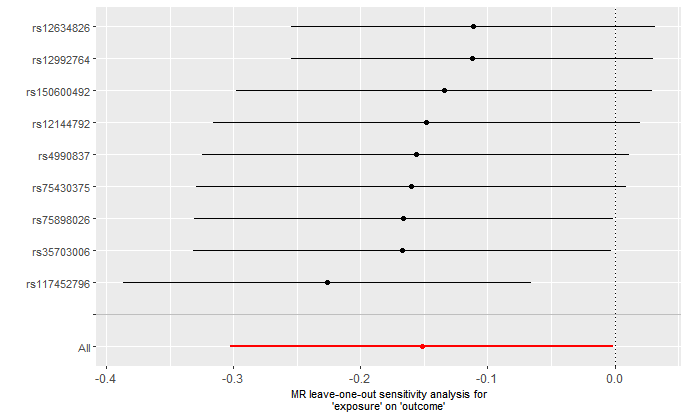
**

**Supplementary Figure S4** The resulis of LOO analysis for TGF-β1 on KOA.

**
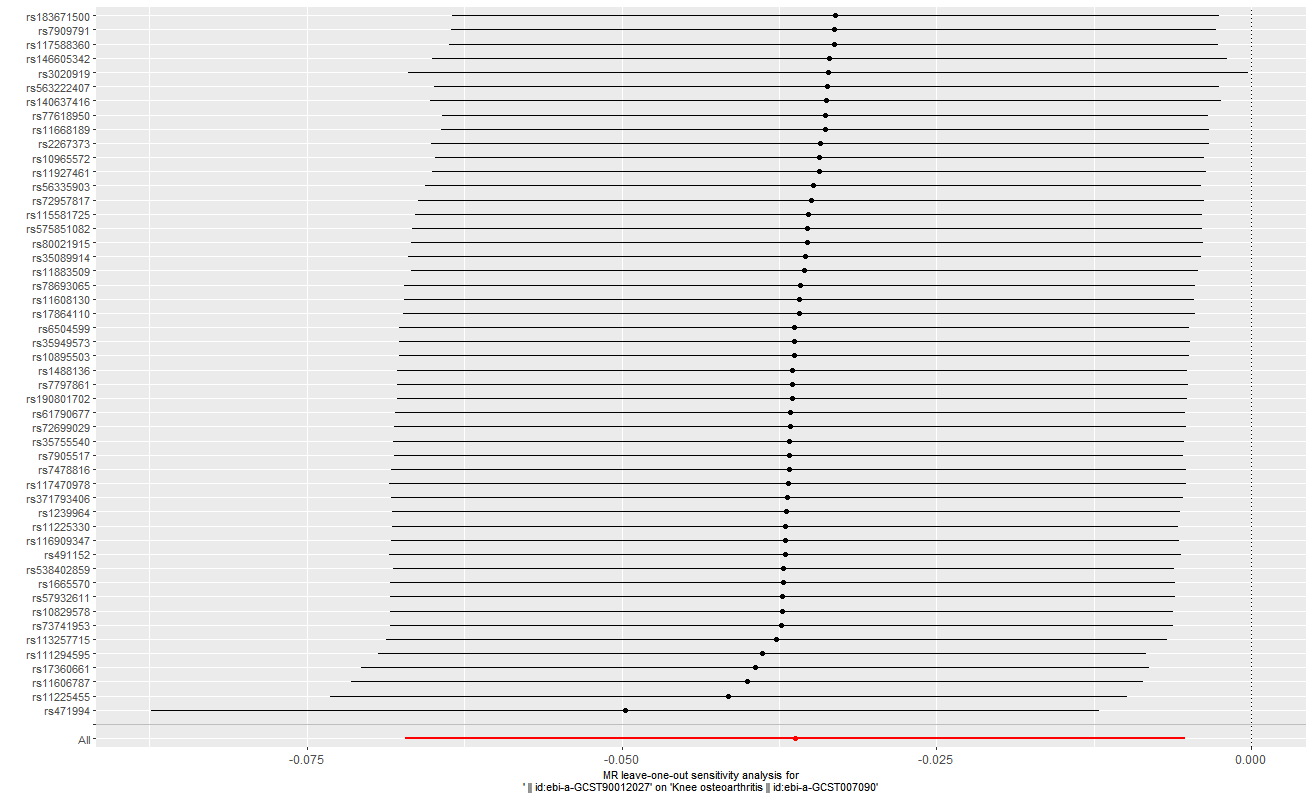
**

**Supplementary Figure S5** The resulis of LOO analysis for MMP-3 on KOA.

**
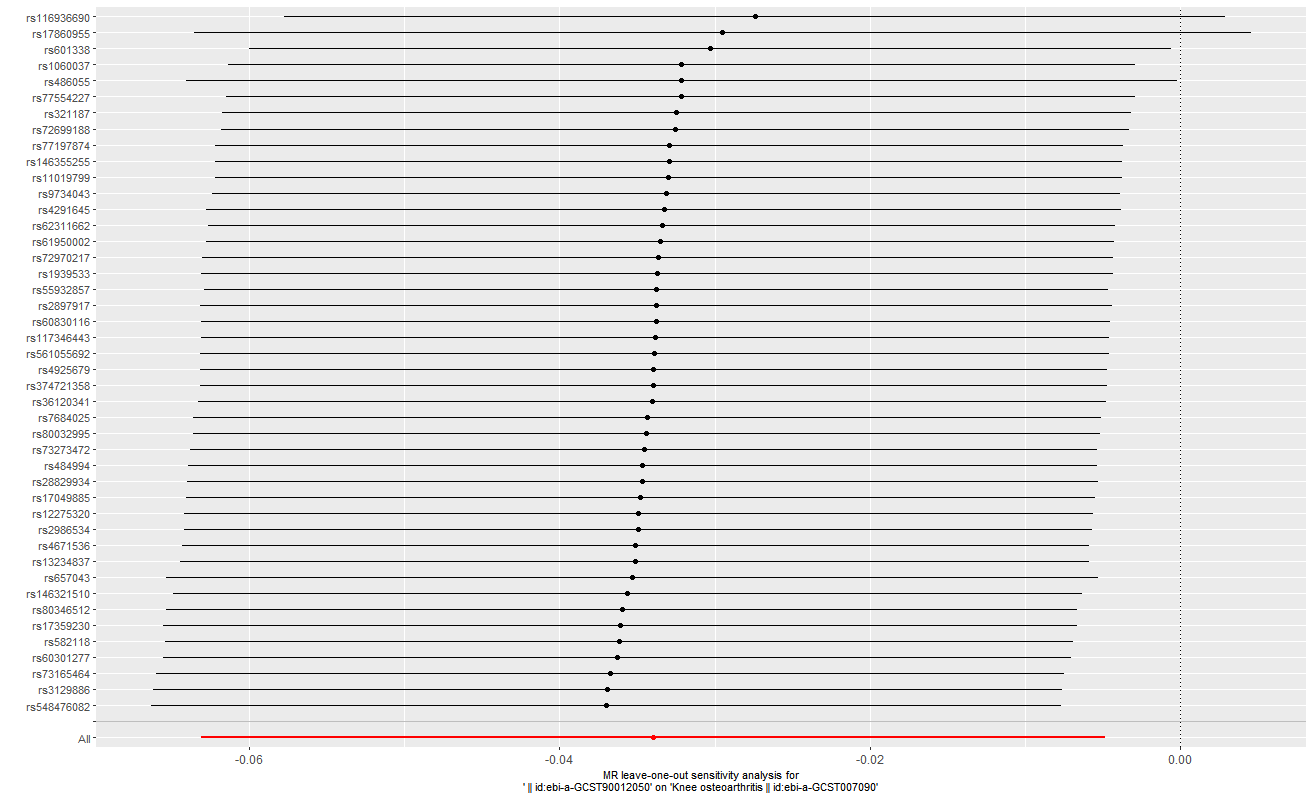
**

**Supplementary Figure S6** The resulis of LOO analysis for MMP-10 on KOA.

**
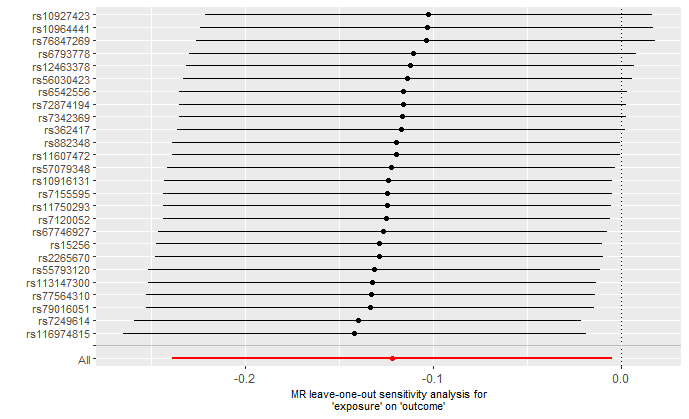
**

**Supplementary Figure S7** The resulis of LOO analysis for OCN on KOA.

**
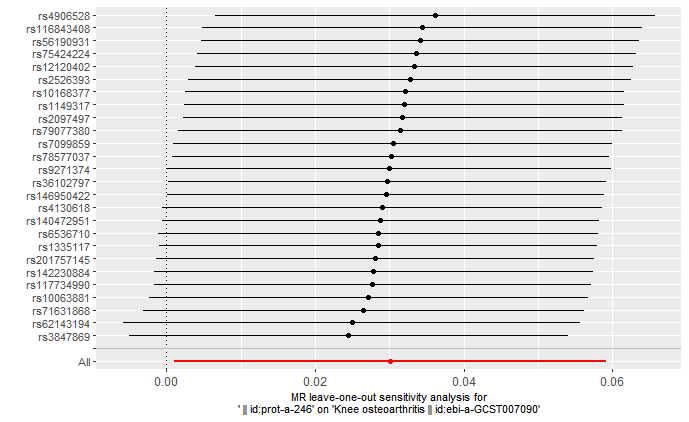
**

**Supplementary Figure S8** The resulis of LOO analysis for PTH on KOA.
